# Supplementary material for: FBA-PRCC. Partial Rank Correlation Coefficient (PRCC) Global Sensitivity Analysis (GSA) in Application to Constraint-Based Models
Source: MDPI journal article supplement (doi:10.3390/biom13030500), 2023-03-09
Supplement: s1 [file s1]

# FBA Sensitivity Analysis

A. Sorokin

05.09.2022

## 1 Read data

### 1.1 Read PRCC results

Find all CSV data in /Volumes/bucket/GoryaninU/FBA\_sensitivity and process them:

```
fl<-dir(bdir,pattern='sobol_data_len11.*.csv')
nums<-as.numeric(sub('sobol_data_len11_40_([0-9]+).csv','\\1',fl))
```

There are datasets for 8192,  $8.192 \times 10^4$ ,  $9.8304 \times 10^4$ ,  $1.14688 \times 10^5$ ,  $1.31072 \times 10^5$ ,  $1.47456 \times 10^5$ ,  $1.6384 \times 10^4$ ,  $2.62144 \times 10^5$ ,  $3.2768 \times 10^4$ ,  $6.5536 \times 10^4$  random points.

```
fl<-fl[order(nums)]
ranks<-matrix(NA,ncol=length(unique(nums)),nrow=3730)
i<-1
for(f in fl){
  df<-read.csv(file.path(bdir,f),sep='\t')
  df<-df[order(df$varnum),]
  cat(f,dim(df),'\\n')
  ranks[,i]<-rank(-abs(df$original),ties.method="first")
  i<-i+1
}
```

```
## sobol_data_len11_40_1.csv 3730 6
## sobol_data_len11_40_2.csv 3730 6
## sobol_data_len11_40_4.csv 3730 6
## sobol_data_len11_40_8.csv 3730 6
## sobol_data_len11_40_10.csv 3730 6
## sobol_data_len11_40_12.csv 3730 6
## sobol_data_len11_40_14.csv 3730 6
## sobol_data_len11_40_16.csv 3730 6
## sobol_data_len11_40_18.csv 3730 6
## sobol_data_len11_40_32.csv 3730 6
```

```
r1<-ODEsensitivity::tdcc(t(ranks[(length(nums)-1:0)]),pearson=TRUE,plot=TRUE)
```

### Scatterplot of Ranks

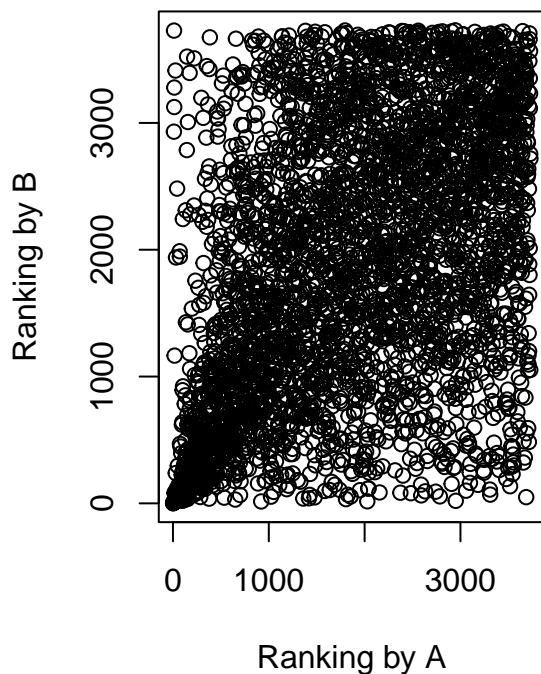

### Scatterplot of Savage Scores

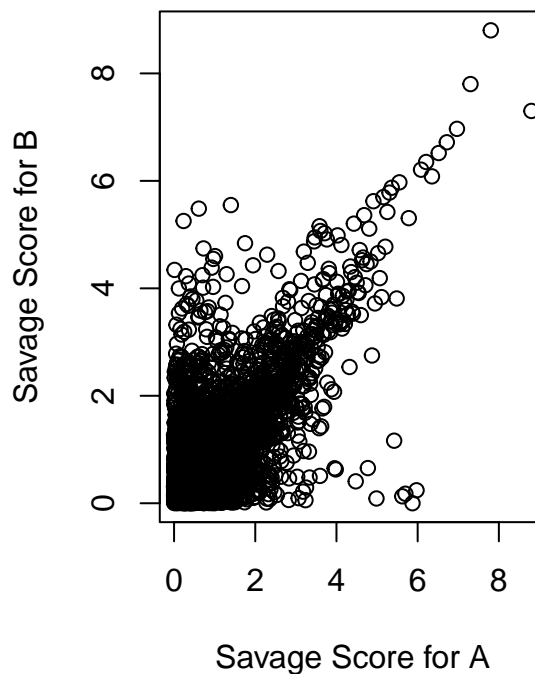

r1

```
##      kendall      pearson
## -1.491817e+04  6.534186e-01
```

## 1.2 Lysine analysis

```
df001<-df[df$pval<0.01,]
row.names(df001)<-df001$varname
pander(df001[order(df001$original),c("original","gdist","pval","ID")],
       justify = c('left', 'center', 'center', 'center', 'left'))
```

|               | original | gdist | pval     | ID          |
|---------------|----------|-------|----------|-------------|
| HACD2i_u      | -0.0184  | 5     | 0        | HACD2i      |
| EX_lcts_e_u   | -0.00661 | 7     | 0.000778 | EX_lcts_e   |
| NOVBCNtpp_u   | -0.00624 | NA    | 0.0015   | NOVBCNtpp   |
| EX_fe3hox_e_l | -0.00595 | 7     | 0.00251  | EX_fe3hox_e |
| HACD1_l       | -0.00591 | 5     | 0.00264  | HACD1       |
| 4PCPpp_u      | -0.00582 | 5     | 0.0031   | 4PCPpp      |
| NO2t2rpp_l    | -0.00559 | 7     | 0.00452  | NO2t2rpp    |
| FUSAtex_l     | -0.00547 | NA    | 0.00545  | FUSAtex     |
| ACALDtex_l    | -0.00545 | 6     | 0.00559  | ACALDtex    |
| CTBTt2rpp_l   | -0.00541 | NA    | 0.00597  | CTBTt2rpp   |
| NO3tex_u      | -0.00539 | 7     | 0.00616  | NO3tex      |
| ARGDCpp_u     | -0.00538 | 5     | 0.0062   | ARGDCpp     |
| EX_pyr_e_l    | -0.00535 | 7     | 0.00651  | EX_pyr_e    |
| CPGNabcpp_u   | -0.00525 | 5     | 0.00761  | CPGNabcpp   |
| CFAS180E_u    | -0.00517 | 4     | 0.00854  | CFAS180E    |
| MEOHtex_l     | 0.00512  | 7     | 0.00927  | MEOHtex     |

|                     | original | gdist | pval     | ID            |
|---------------------|----------|-------|----------|---------------|
| PRMICI_l            | 0.00513  | 5     | 0.00905  | PRMICI        |
| ACACtex_l           | 0.00517  | 6     | 0.00863  | ACACtex       |
| MTHFC_l             | 0.00519  | 4     | 0.00835  | MTHFC         |
| ACONTa_u            | 0.0052   | 5     | 0.00817  | ACONTa        |
| HCYSMT2_u           | 0.00524  | 4     | 0.00772  | HCYSMT2       |
| EX_gam6p_e_u        | 0.00531  | 7     | 0.00698  | EX_gam6p_e    |
| EX_dad_2_e_l        | 0.00538  | 8     | 0.00626  | EX_dad_2_e    |
| EX_glcr_e_l         | 0.00551  | 9     | 0.00513  | EX_glcr_e     |
| EX_rmn_e_u          | 0.0057   | 10    | 0.00377  | EX_rmn_e      |
| LPLIPAL2A161_u      | 0.00587  | 5     | 0.00285  | LPLIPAL2A161  |
| LEUt2rpp_l          | 0.00601  | 4     | 0.00223  | LEUt2rpp      |
| ALAGLUE_u           | 0.00624  | 5     | 0.00151  | ALAGLUE       |
| LADGMDH_u           | 0.00681  | 4     | 0.000542 | LADGMDH       |
| PSCLYSt2pp_u        | 0.00692  | 6     | 0.000439 | PSCLYSt2pp    |
| EX_psclys_e_l       | 0.00718  | 8     | 0.00026  | EX_psclys_e   |
| MDH2_u              | 0.0072   | 5     | 0.000251 | MDH2          |
| PSCLYStex_u         | 0.00745  | 7     | 0.000153 | PSCLYStex     |
| LALGP_u             | 0.00761  | 4     | 0.000108 | LALGP         |
| EX_akg_e_l          | 0.00809  | 7     | 3.93e-05 | EX_akg_e      |
| GRTT_u              | 0.0084   | 5     | 1.95e-05 | GRTT          |
| EX_3ump_e_u         | 0.00874  | 9     | 8.82e-06 | EX_3ump_e     |
| ADNCYC_u            | 0.00915  | NA    | 3.26e-06 | ADNCYC        |
| FRULYStex_u         | 0.00917  | 6     | 3.14e-06 | FRULYStex     |
| DAPabcpp_u          | 0.00945  | 4     | 1.54e-06 | DAPabcpp      |
| AGM3PH_u            | 0.00958  | 6     | 1.12e-06 | AGM3PH        |
| FEOXAMabcpp_u       | 0.00985  | 5     | 5.51e-07 | FEOXAMabcpp   |
| SELNPS_u            | 0.0101   | 6     | 3.12e-07 | SELNPS        |
| 26DAHtex_u          | 0.0102   | 5     | 2.18e-07 | 26DAHtex      |
| FRULYSt2pp_u        | 0.0104   | 5     | 1.23e-07 | FRULYSt2pp    |
| **EX_26dap__M_e_l** | 0.0112   | 6     | 1.27e-08 | EX_26dap__M_e |
| EX_frulys_e_l       | 0.0112   | 7     | 1.26e-08 | EX_frulys_e   |
| MOHMT_u             | 0.0129   | 4     | 4.63e-11 | MOHMT         |
| CBMD_u              | 0.0172   | 8     | 0        | CBMD          |
| FRULYSDG_u          | 0.0498   | 3     | 0        | FRULYSDG      |
| FRULYSK_u           | 0.052    | 4     | 0        | FRULYSK       |
| DAPDC_u             | 0.12     | 3     | 0        | DAPDC         |
| **EX_lys__L_e_u**   | 0.487    | 0     | 0        | EX_lys__L_e   |
| LYStex_l            | 0.487    | 1     | 0        | LYStex        |
| LYSt3pp_u           | 0.487    | 2     | 0        | LYSt3pp       |

```
pander(df001[order(df001$original),c("original","gdist","Name")],
      justify = c('left', 'center', 'center', 'left'))
```

|               | original | gdist | Name                                                            |
|---------------|----------|-------|-----------------------------------------------------------------|
| HACD2i_u      | -0.0184  | 5     | 3-hydroxyacyl-CoA dehydrogenase (3-oxohexanoyl-CoA)             |
| EX_lcts_e_u   | -0.00661 | 7     | Lactose exchange                                                |
| NOVBCNtpp_u   | -0.00624 | NA    | Novobiocin transport via TolC system                            |
| EX_fe3hox_e_l | -0.00595 | 7     | Fe(III)hydroxamate exchange                                     |
| HACD1_l       | -0.00591 | 5     | 3-hydroxyacyl-CoA dehydrogenase (acetoacetyl-CoA)               |
| 4PCPpp_u      | -0.00582 | 5     | Tetrapeptide L,D-carboxypeptidase (periplasm)                   |
| NO2t2rpp_l    | -0.00559 | 7     | Nitrite transport in via proton symport, reversible (periplasm) |

|                       | original | gdist | Name                                                                                              |
|-----------------------|----------|-------|---------------------------------------------------------------------------------------------------|
| FUSAtex_l             | -0.00547 | NA    | Fusidic acid transport via diffusion (extracellular to periplasm)                                 |
| ACALDtex_l            | -0.00545 | 6     | Acetaldehyde transport via diffusion (extracellular to periplasm)                                 |
| CTBTt2rpp_l           | -0.00541 | NA    | Cronobetaine outward transport (H <sup>+</sup> antiport)                                          |
| NO3tex_u              | -0.00539 | 7     | Nitrate transport via diffusion (extracellular to periplasm)                                      |
| ARGDCpp_u             | -0.00538 | 5     | Arginine decarboxylase                                                                            |
| EX_pyr_e_l            | -0.00535 | 7     | Pyruvate exchange                                                                                 |
| CPGNabcpp_u           | -0.00525 | 5     | Coprogen transport via ABC system (periplasm)                                                     |
| CFAS180E_u            | -0.00517 | 4     | Cyclopropane fatty acid synthase (Phosphatidylethanolamine, n-C18:0)                              |
| MEOHtex_l             | 0.00512  | 7     | Methanol transport via diffusion (extracellular to periplasm)                                     |
| PRMCI_l               | 0.00513  | 5     | 1-(5-phosphoribosyl)-5-[(5-phosphoribosylamino)methylideneamino]imidazole-4-carboxamide isomerase |
| ACACtex_l             | 0.00517  | 6     | Acetoacetate transport via diffusion (extracellular to periplasm)                                 |
| MTHFC_l               | 0.00519  | 4     | Methenyltetrahydrofolate cyclohydrolase                                                           |
| ACONTa_u              | 0.0052   | 5     | Aconitase (half-reaction A, Citrate hydro-lyase)                                                  |
| HCYSMT2_u             | 0.00524  | 4     | Homocysteine Methyltransferase                                                                    |
| EX_gam6p_e_u          | 0.00531  | 7     | D-Glucosamine 6-phosphate exchange                                                                |
| EX_dad_2_e_l          | 0.00538  | 8     | Deoxyadenosine exchange                                                                           |
| EX_glcr_e_l           | 0.00551  | 9     | D-Glucarate exchange                                                                              |
| EX_rmn_e_u            | 0.0057   | 10    | L-Rhamnose exchange                                                                               |
| LPLIPAL2A161_u        | 0.00587  | 5     | Lysophospholipase L2 (2-acylglycerophosphotidate, n-C16:1)                                        |
| LEUt2rpp_l            | 0.00601  | 4     | L-leucine reversible transport via proton symport (periplasm)                                     |
| ALAGLUE_u             | 0.00624  | 5     | L-alanyl-gamma-glutamate epimerase                                                                |
| LADGMDH_u             | 0.00681  | 4     | L-alanyl-gamma-D-glutamyl-meso-diaminopimelate hydrolase                                          |
| PSCLYST2pp_u          | 0.00692  | 6     | Psicoselysine transport via proton symport (periplasm)                                            |
| EX_psclys_e_l         | 0.00718  | 8     | Psicoselysine exchange                                                                            |
| MDH2_u                | 0.0072   | 5     | Malate dehydrogenase (ubiquinone 8 as acceptor)                                                   |
| PSCLYSTex_u           | 0.00745  | 7     | Psicoselysine transporter via diffusion (extracellular)                                           |
| LALGP_u               | 0.00761  | 4     | L-alanyl-gamma-L-glutamate peptidase                                                              |
| EX_akg_e_l            | 0.00809  | 7     | 2-Oxoglutarate exchange                                                                           |
| GRTT_u                | 0.0084   | 5     | Geranyltranstransferase                                                                           |
| EX_3ump_e_u           | 0.00874  | 9     | 3'-UMP exchange                                                                                   |
| ADNCYC_u              | 0.00915  | NA    | Adenylate cyclase                                                                                 |
| FRULYSTex_u           | 0.00917  | 6     | Fructoselysine transporter via diffusion (extracellular)                                          |
| DAPabcpp_u            | 0.00945  | 4     | M-diaminopimelic acid ABC transport (periplasm)                                                   |
| AGM3PH_u              | 0.00958  | 6     | N-Acetyl-D-glucosamine(anhydrous)N-Acetylmuramyl-tripeptide beta -1,4-N-acetylglucosaminidase     |
| FEOXAMabcpp_u         | 0.00985  | 5     | Ferroxamine transport via ABC system (periplasm)                                                  |
| SELNPS_u              | 0.0101   | 6     | Selenophosphate synthase                                                                          |
| 26DAHtex_u            | 0.0102   | 5     | Meso-2,6-Diaminoheptanedioate transport via diffusion (extracellular to periplasm)                |
| FRULYST2pp_u          | 0.0104   | 5     | Fructoselysine transport via proton symport (periplasm)                                           |
| **EX_26dap__M_0.0112  | 0.0112   | 6     | Meso-2,6-Diaminoheptanedioate exchange                                                            |
| EX_frulys_e_l         | 0.0112   | 7     | Fructoselysine exchange                                                                           |
| MOHMT_u               | 0.0129   | 4     | 3-methyl-2-oxobutanoate hydroxymethyltransferase                                                  |
| CBMD_u                | 0.0172   | 8     | Carbamate deaminase                                                                               |
| FRULYSDG_u            | 0.0498   | 3     | Fructoselysine phosphate deglycase                                                                |
| FRULYSK_u             | 0.052    | 4     | Fructoselysine Kinase                                                                             |
| DAPDC_u               | 0.12     | 3     | Diaminopimelate decarboxylase                                                                     |
| **EX_lys__L_e_u*0.487 | 0.487    | 0     | L-Lysine exchange                                                                                 |
| LYStex_l              | 0.487    | 1     | L-lysine transport via diffusion (extracellular to periplasm)                                     |

|           | original | gdist | Name                                                                |
|-----------|----------|-------|---------------------------------------------------------------------|
| LYSt3pp_u | 0.487    | 2     | L-lysine transport out via proton antiport (cytoplasm to periplasm) |

```
pander(df001[order(df001$original),c("original","gdist","Equation")],
      justify = c('left', 'center', 'center', 'left'))
```

|                | original | gdist | Equation                                                 |
|----------------|----------|-------|----------------------------------------------------------|
| HACD2i_u       | -0.0184  | 5     | 3hhcoa_c + nad_c -> 3ohcoa_c + h_c + nadh_c              |
| EX_lcts_e_u    | -0.00661 | 7     | lcts_e ->                                                |
| NOVBCNtpp_u    | -0.00624 | NA    | h_p + novbcn_p -> h_c + novbcn_e                         |
| EX_fe3hox_e_l  | -0.00595 | 7     | fe3hox_e ->                                              |
| HACD1_l        | -0.00591 | 5     | aacoa_c + h_c + nadh_c <=> 3hbcoa_c + nad_c              |
| 4PCPpp_u       | -0.00582 | 5     | LalaDgluMdapDala_p + h2o_p -> LalaDgluMdap_p + ala__D_p  |
| NO2t2rpp_l     | -0.00559 | 7     | h_p + no2_p <=> h_c + no2_c                              |
| FUSAtex_l      | -0.00547 | NA    | fusa_e <=> fusa_p                                        |
| ACALDt看_l      | -0.00545 | 6     | acald_e <=> acald_p                                      |
| CTBTt2rpp_l    | -0.00541 | NA    | ctbt_p + h_p <=> ctbt_c + h_c                            |
| NO3tex_u       | -0.00539 | 7     | no3_e <=> no3_p                                          |
| ARGDCpp_u      | -0.00538 | 5     | arg__L_p + h_p -> agm_p + co2_p                          |
| EX_pyr_e_l     | -0.00535 | 7     | pyr_e ->                                                 |
| CPGNabcpp_u    | -0.00525 | 5     | atp_c + cpgn_p + h2o_c -> adp_c + cpgn_c + h_c + pi_c    |
| CFAS180E_u     | -0.00517 | 4     | 2.0 amet_c + pe181_c -> 2.0 ahcys_c + cpe180_c + 2.0 h_c |
| MEOHtex_l      | 0.00512  | 7     | meoh_e <=> meoh_p                                        |
| PRMICI_l       | 0.00513  | 5     | prfp_c <=> prlp_c                                        |
| ACACtex_l      | 0.00517  | 6     | acac_e <=> acac_p                                        |
| MTHFC_l        | 0.00519  | 4     | h2o_c + methf_c <=> 10fthf_c + h_c                       |
| ACONTa_u       | 0.0052   | 5     | cit_c <=> acon_C_c + h2o_c                               |
| HCYSMT2_u      | 0.00524  | 4     | hcys__L_c + mmet_c -> h_c + 2.0 met__L_c                 |
| EX_gam6p_e_u   | 0.00531  | 7     | gam6p_e ->                                               |
| EX_dad_2_e_l   | 0.00538  | 8     | dad_2_e ->                                               |
| EX_glcr_e_l    | 0.00551  | 9     | glcr_e ->                                                |
| EX_rmn_e_u     | 0.0057   | 10    | rmn_e ->                                                 |
| LPLIPAL2A161_u | 0.00587  | 5     | 2hdec9eg3p_c + h2o_c -> glyc3p_c + 2.0 h_c + hdcea_c     |
| LEUt2rpp_l     | 0.00601  | 4     | h_p + leu__L_p <=> h_c + leu__L_c                        |
| ALAGLUE_u      | 0.00624  | 5     | LalaDglu_c <=> LalaLglu_c                                |
| LADGMDH_u      | 0.00681  | 4     | LalaDgluMdap_c + h2o_c -> 26dap__M_c + LalaDglu_c        |
| PSCLYSt2pp_u   | 0.00692  | 6     | h_p + psclys_p -> h_c + psclys_c                         |
| EX_psclys_e_l  | 0.00718  | 8     | psclys_e ->                                              |
| MDH2_u         | 0.0072   | 5     | mal__L_c + q8_c -> oaa_c + q8h2_c                        |
| PSCLYStex_u    | 0.00745  | 7     | psclys_e <=> psclys_p                                    |
| LALGP_u        | 0.00761  | 4     | LalaLglu_c + h2o_c -> ala__L_c + glu__L_c                |
| EX_akg_e_l     | 0.00809  | 7     | akg_e ->                                                 |
| GRTT_u         | 0.0084   | 5     | grdp_c + ipdp_c -> frdp_c + ppi_c                        |

|                     | original | gdist | Equation                                                         |
|---------------------|----------|-------|------------------------------------------------------------------|
| EX_3ump_e_u         | 0.00874  | 9     | 3ump_e ->                                                        |
| ADNCYC_u            | 0.00915  | NA    | atp_c -> camp_c + ppi_c                                          |
| FRULYStex_u         | 0.00917  | 6     | frulys_e <=> frulys_p                                            |
| DAPabcpp_u          | 0.00945  | 4     | 26dap__M_p + atp_c + h2o_c -><br>26dap__M_c + adp_c + h_c + pi_c |
| AGM3PH_u            | 0.00958  | 6     | anhgm3p_c + h2o_c -> acgam_c +<br>anhm3p_c                       |
| FEOXAMabcpp_u       | 0.00985  | 5     | atp_c + feoxam_p + h2o_c -> adp_c +<br>feoxam_c + h_c + pi_c     |
| SELNPS_u            | 0.0101   | 6     | atp_c + h2o_c + seln_c -> amp_c + pi_c<br>+ selnp_c              |
| 26DAHtex_u          | 0.0102   | 5     | 26dap__M_e <=> 26dap__M_p                                        |
| FRULYSt2pp_u        | 0.0104   | 5     | frulys_p + h_p -> frulys_c + h_c                                 |
| **EX_26dap__M_e_l** | 0.0112   | 6     | 26dap__M_e ->                                                    |
| EX_frulys_e_l       | 0.0112   | 7     | frulys_e ->                                                      |
| MOHMT_u             | 0.0129   | 4     | 3mob_c + h2o_c + mlthf_c -> 2dhp_c +<br>thf_c                    |
| CBMD_u              | 0.0172   | 8     | cbm_c + 2.0 h_c -> co2_c + nh4_c                                 |
| FRULYSDG_u          | 0.0498   | 3     | frulysp_c + h2o_c <=> g6p_c +<br>lys__L_c                        |
| FRULYSK_u           | 0.052    | 4     | atp_c + frulys_c -> adp_c + frulysp_c +<br>h_c                   |
| DAPDC_u             | 0.12     | 3     | 26dap__M_c + h_c -> co2_c +<br>lys__L_c                          |
| **EX_lys__L_e_u**   | 0.487    | 0     | lys__L_e ->                                                      |
| LYStex_l            | 0.487    | 1     | lys__L_e <=> lys__L_p                                            |
| LYSt3pp_u           | 0.487    | 2     | h_p + lys__L_c -> h_c + lys__L_p                                 |

```
qplot(original,gdist,data=df001)+xlab('PRCC')+ylab('Network distance')
```

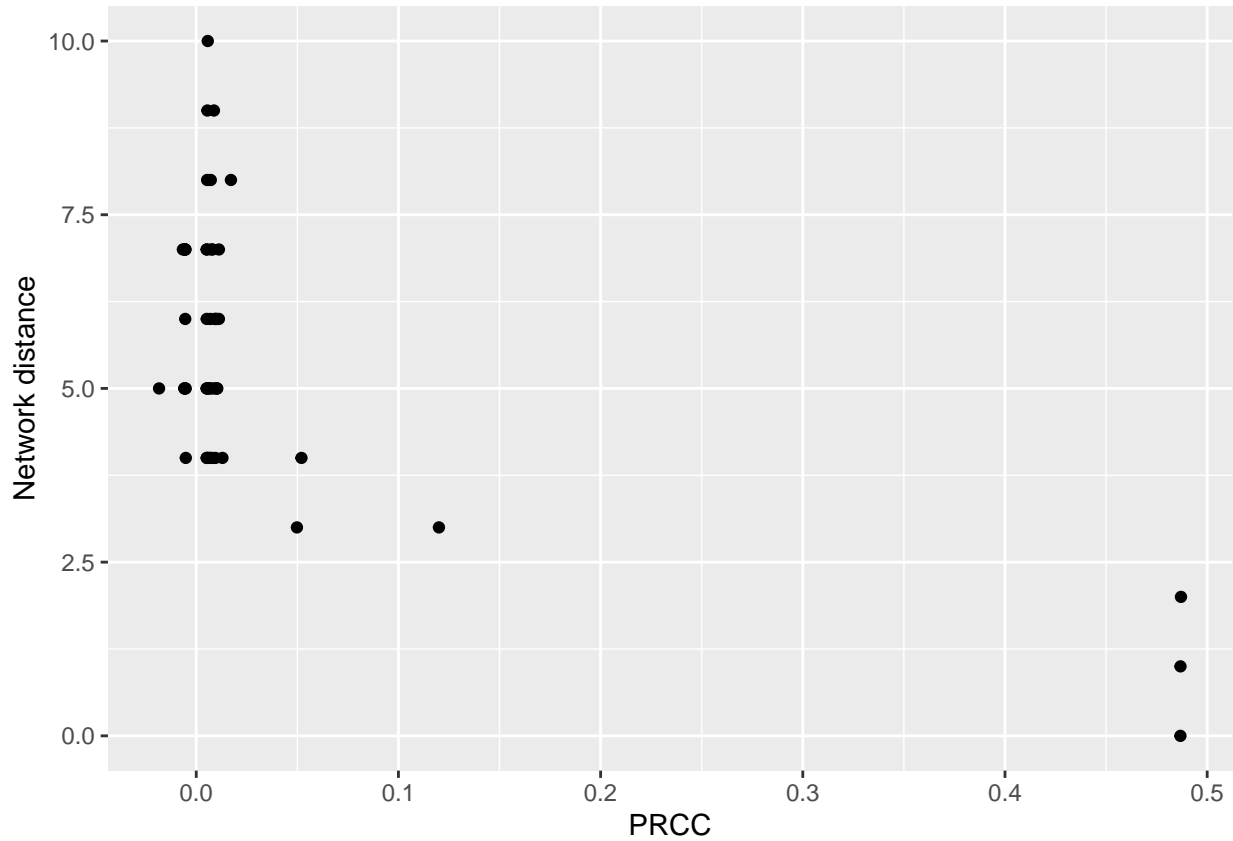

```
df005<-df[df$pval<0.05,]
row.names(df005)<-df005$varname
pander(df005[order(df005$original),c("original","gdist","pval","ID")],
  justify = c('left', 'center', 'center', 'center', 'left'))
```

|               | original | gdist | pval     | ID          |
|---------------|----------|-------|----------|-------------|
| HACD2i_u      | -0.0184  | 5     | 0        | HACD2i      |
| EX_lcts_e_u   | -0.00661 | 7     | 0.000778 | EX_lcts_e   |
| NOVBCNtpp_u   | -0.00624 | NA    | 0.0015   | NOVBCNtpp   |
| EX_fe3hox_e_l | -0.00595 | 7     | 0.00251  | EX_fe3hox_e |
| HACD1_l       | -0.00591 | 5     | 0.00264  | HACD1       |
| 4PCPpp_u      | -0.00582 | 5     | 0.0031   | 4PCPpp      |
| NO2t2rpp_l    | -0.00559 | 7     | 0.00452  | NO2t2rpp    |
| FUSAtex_l     | -0.00547 | NA    | 0.00545  | FUSAtex     |
| ACALDtex_l    | -0.00545 | 6     | 0.00559  | ACALDtex    |
| CTBTt2rpp_l   | -0.00541 | NA    | 0.00597  | CTBTt2rpp   |
| NO3tex_u      | -0.00539 | 7     | 0.00616  | NO3tex      |
| ARGDCpp_u     | -0.00538 | 5     | 0.0062   | ARGDCpp     |
| EX_pyr_e_l    | -0.00535 | 7     | 0.00651  | EX_pyr_e    |
| CPGNabcpp_u   | -0.00525 | 5     | 0.00761  | CPGNabcpp   |
| CFAS180E_u    | -0.00517 | 4     | 0.00854  | CFAS180E    |
| A5PISO_l      | -0.00505 | 6     | 0.0103   | A5PISO      |
| CU2tex_u      | -0.00504 | 5     | 0.0105   | CU2tex      |
| GLUNpp_u      | -0.00497 | 5     | 0.0116   | GLUNpp      |
| MDRPD_u       | -0.00489 | 6     | 0.013    | MDRPD       |
| PROt2rpp_l    | -0.00487 | 4     | 0.0133   | PROt2rpp    |

|                   | original | gdist | pval   | ID           |
|-------------------|----------|-------|--------|--------------|
| EX_3hpp_e_u       | -0.00486 | 13    | 0.0134 | EX_3hpp_e    |
| **EX_hom__L_e_l** | -0.00482 | 7     | 0.0142 | EX_hom__L_e  |
| EX_damp_e_l       | -0.00482 | 9     | 0.0143 | EX_damp_e    |
| FACOAEl61_u       | -0.00481 | 5     | 0.0145 | FACOAEl61    |
| AACPS9_u          | -0.00479 | 6     | 0.0149 | AACPS9       |
| HPPPNtex_u        | -0.00478 | 9     | 0.0151 | HPPPNtex     |
| GLTPD_l           | -0.00469 | 6     | 0.0171 | GLTPD        |
| HEPTA1_u          | -0.00464 | 7     | 0.0184 | HEPTA1       |
| 3hoxpactex_l      | -0.00459 | NA    | 0.0197 | 3hoxpactex   |
| UDPGtex_l         | -0.00458 | 7     | 0.0198 | UDPGtex      |
| MCPST_u           | -0.00455 | 5     | 0.0207 | MCPST        |
| GLYC2Ptex_u       | -0.00454 | 6     | 0.0211 | GLYC2Ptex    |
| NTD9_u            | -0.00453 | 5     | 0.0214 | NTD9         |
| PGI_l             | -0.00453 | 4     | 0.0214 | PGI          |
| CBLAT_l           | -0.00452 | 4     | 0.0217 | CBLAT        |
| UM4PCP_u          | -0.00445 | 5     | 0.0237 | UM4PCP       |
| HCINNMt2rpp_u     | -0.00442 | 8     | 0.0248 | HCINNMt2rpp  |
| GLUABUTt7pp_u     | -0.00439 | 4     | 0.0256 | GLUABUTt7pp  |
| M1PD_u            | -0.00434 | 5     | 0.0275 | M1PD         |
| PLIPA2A120pp_u    | -0.00433 | 6     | 0.0277 | PLIPA2A120pp |
| ACLS_u            | -0.00428 | 5     | 0.0294 | ACLS         |
| EX_cynt_e_l       | -0.00421 | 8     | 0.0324 | EX_cynt_e    |
| 2AGPG161tipp_u    | -0.0042  | 5     | 0.0328 | 2AGPG161tipp |
| MALDDH_u          | -0.00419 | 5     | 0.0333 | MALDDH       |
| GLCURt2rpp_u      | -0.00416 | 9     | 0.0347 | GLCURt2rpp   |
| AMAOTr_l          | -0.00411 | 4     | 0.0365 | AMAOTr       |
| ASPK_l            | -0.00404 | 4     | 0.0399 | ASPK         |
| SERtex_l          | -0.00404 | 5     | 0.0401 | SERtex       |
| MOX_u             | -0.00402 | 5     | 0.0412 | MOX          |
| ASO3tex_l         | -0.004   | 9     | 0.0418 | ASO3tex      |
| FALDH2_l          | -0.00396 | 6     | 0.0444 | FALDH2       |
| GLCNt2rpp_u       | -0.00392 | 6     | 0.0461 | GLCNt2rpp    |
| ANS_u             | -0.00392 | 4     | 0.0462 | ANS          |
| NAtex_l           | -0.00392 | NA    | 0.0464 | NA           |
| FCLPA_l           | -0.00388 | 5     | 0.0485 | FCLPA        |
| ME1_u             | -0.00388 | 5     | 0.0488 | ME1          |
| PRPPS_l           | -0.00386 | 5     | 0.0499 | PRPPS        |
| UREAtpp_l         | 0.00386  | 5     | 0.0497 | UREAtpp      |
| EX_r5p_e_u        | 0.00388  | 9     | 0.0488 | EX_r5p_e     |
| ALAALAr_u         | 0.00391  | 5     | 0.0466 | ALAALAr      |
| FEOXAMUtex_u      | 0.00393  | 6     | 0.0459 | FEOXAMUtex   |
| PUNP6_l           | 0.00402  | 6     | 0.0412 | PUNP6        |
| NDPK3_l           | 0.00404  | 4     | 0.0402 | NDPK3        |
| CLPNS141pp_l      | 0.00407  | 5     | 0.0385 | CLPNS141pp   |
| EX_23ccmp_e_l     | 0.00408  | 10    | 0.0382 | EX_23ccmp_e  |
| NDPK7_l           | 0.00411  | 4     | 0.0365 | NDPK7        |
| EX_glyald_e_l     | 0.00414  | 9     | 0.0352 | EX_glyald_e  |
| NO3R2bpp_u        | 0.00415  | 7     | 0.0348 | NO3R2bpp     |
| F6PA_l            | 0.00421  | 5     | 0.0322 | F6PA         |
| SPMDabcpp_u       | 0.00424  | 4     | 0.031  | SPMDabcpp    |
| FRULYStex_l       | 0.00426  | 6     | 0.0302 | FRULYStex    |
| EX_slnt_e_l       | 0.00431  | 10    | 0.0285 | EX_slnt_e    |



|                     | original | gdist | pval     | ID            |
|---------------------|----------|-------|----------|---------------|
| GLYC2Ptex_l         | 0.00431  | 6     | 0.0284   | GLYC2Ptex     |
| EX_acgam1p_e_u      | 0.00431  | 8     | 0.0284   | EX_acgam1p_e  |
| DINStex_l           | 0.00432  | 8     | 0.028    | DINStex       |
| SUCBZL_u            | 0.00435  | 6     | 0.0271   | SUCBZL        |
| EX_ocdca_e_l        | 0.00443  | 8     | 0.0244   | EX_ocdca_e    |
| EX_cl_e_l           | 0.00446  | 6     | 0.0233   | EX_cl_e       |
| EX_hg2_e_l          | 0.00449  | NA    | 0.0225   | EX_hg2_e      |
| PTAr_u              | 0.00451  | 4     | 0.0218   | PTAr          |
| DALAtex_l           | 0.0046   | 5     | 0.0193   | DALAtex       |
| EX_g3pe_e_l         | 0.00462  | 7     | 0.0189   | EX_g3pe_e     |
| G3PD7_u             | 0.00463  | 4     | 0.0186   | G3PD7         |
| EX_g3pc_e_l         | 0.0047   | 8     | 0.0168   | EX_g3pc_e     |
| APRAUR_u            | 0.00481  | 6     | 0.0145   | APRAUR        |
| ECOA8_l             | 0.00483  | 6     | 0.014    | ECOA8         |
| PLIPA2A180pp_u      | 0.00489  | 6     | 0.0129   | PLIPA2A180pp  |
| GALAMtex_u          | 0.00491  | NA    | 0.0125   | GALAMtex      |
| SUCBZS_u            | 0.005    | 5     | 0.0111   | SUCBZS        |
| MEOHtex_l           | 0.00512  | 7     | 0.00927  | MEOHtex       |
| PRMICI_l            | 0.00513  | 5     | 0.00905  | PRMICI        |
| ACACtex_l           | 0.00517  | 6     | 0.00863  | ACACtex       |
| MTHFC_l             | 0.00519  | 4     | 0.00835  | MTHFC         |
| ACONTa_u            | 0.0052   | 5     | 0.00817  | ACONTa        |
| HCYSMT2_u           | 0.00524  | 4     | 0.00772  | HCYSMT2       |
| EX_gam6p_e_u        | 0.00531  | 7     | 0.00698  | EX_gam6p_e    |
| EX_dad_2_e_l        | 0.00538  | 8     | 0.00626  | EX_dad_2_e    |
| EX_gler_e_l         | 0.00551  | 9     | 0.00513  | EX_gler_e     |
| EX_rmn_e_u          | 0.0057   | 10    | 0.00377  | EX_rmn_e      |
| LPLIPAL2A161_u      | 0.00587  | 5     | 0.00285  | LPLIPAL2A161  |
| LEUt2rpp_l          | 0.00601  | 4     | 0.00223  | LEUt2rpp      |
| ALAGLUE_u           | 0.00624  | 5     | 0.00151  | ALAGLUE       |
| LADGMDH_u           | 0.00681  | 4     | 0.000542 | LADGMDH       |
| PSCLYSt2pp_u        | 0.00692  | 6     | 0.000439 | PSCLYSt2pp    |
| EX_psclys_e_l       | 0.00718  | 8     | 0.00026  | EX_psclys_e   |
| MDH2_u              | 0.0072   | 5     | 0.000251 | MDH2          |
| PSCLYStex_u         | 0.00745  | 7     | 0.000153 | PSCLYStex     |
| LALGP_u             | 0.00761  | 4     | 0.000108 | LALGP         |
| EX_akg_e_l          | 0.00809  | 7     | 3.93e-05 | EX_akg_e      |
| GRTT_u              | 0.0084   | 5     | 1.95e-05 | GRTT          |
| EX_3ump_e_u         | 0.00874  | 9     | 8.82e-06 | EX_3ump_e     |
| ADNCYC_u            | 0.00915  | NA    | 3.26e-06 | ADNCYC        |
| FRULYStex_u         | 0.00917  | 6     | 3.14e-06 | FRULYStex     |
| DAPabcpp_u          | 0.00945  | 4     | 1.54e-06 | DAPabcpp      |
| AGM3PH_u            | 0.00958  | 6     | 1.12e-06 | AGM3PH        |
| FEOXAMabcpp_u       | 0.00985  | 5     | 5.51e-07 | FEOXAMabcpp   |
| SELNPS_u            | 0.0101   | 6     | 3.12e-07 | SELNPS        |
| 26DAHtex_u          | 0.0102   | 5     | 2.18e-07 | 26DAHtex      |
| FRULYSt2pp_u        | 0.0104   | 5     | 1.23e-07 | FRULYSt2pp    |
| **EX_26dap__M_e_l** | 0.0112   | 6     | 1.27e-08 | EX_26dap__M_e |
| EX_frulys_e_l       | 0.0112   | 7     | 1.26e-08 | EX_frulys_e   |
| MOHMT_u             | 0.0129   | 4     | 4.63e-11 | MOHMT         |
| CBMD_u              | 0.0172   | 8     | 0        | CBMD          |
| FRULYSDG_u          | 0.0498   | 3     | 0        | FRULYSDG      |

|                   | original | gdist | pval | ID          |
|-------------------|----------|-------|------|-------------|
| FRULYSK_u         | 0.052    | 4     | 0    | FRULYSK     |
| DAPDC_u           | 0.12     | 3     | 0    | DAPDC       |
| **EX_lys__L_e_u** | 0.487    | 0     | 0    | EX_lys__L_e |
| LYStex_l          | 0.487    | 1     | 0    | LYStex      |
| LYSt3pp_u         | 0.487    | 2     | 0    | LYSt3pp     |

```
pander(df005[order(df005$original),c("original", "gdist", "Name")],
      justify = c('left', 'center', 'center', 'left'))
```

|                   | original | gdist | Name                                                                                                   |
|-------------------|----------|-------|--------------------------------------------------------------------------------------------------------|
| HACD2i_u          | -0.0184  | 5     | 3-hydroxyacyl-CoA dehydrogenase (3-oxohexanoyl-CoA)                                                    |
| EX_lcts_e_u       | -0.00661 | 7     | Lactose exchange                                                                                       |
| NOVBCNtpp_u       | -0.00624 | NA    | Novobiocin transport via TolC system                                                                   |
| EX_fe3hox_e_l     | -0.00595 | 7     | Fe(III)hydroxamate exchange                                                                            |
| HACD1_l           | -0.00591 | 5     | 3-hydroxyacyl-CoA dehydrogenase (acetoacetyl-CoA)                                                      |
| 4PCPpp_u          | -0.00582 | 5     | Tetrapeptide L,D-carboxypeptidase (periplasm)                                                          |
| NO2t2rpp_l        | -0.00559 | 7     | Nitrite transport in via proton symport, reversible (periplasm)                                        |
| FUSAtex_l         | -0.00547 | NA    | Fusidic acid transport via diffusion (extracellular to periplasm)                                      |
| ACALDtex_l        | -0.00545 | 6     | Acetaldehyde transport via diffusion (extracellular to periplasm)                                      |
| CTBTt2rpp_l       | -0.00541 | NA    | Cronobetaine outward transport (H+ antiport)                                                           |
| NO3tex_u          | -0.00539 | 7     | Nitrate transport via diffusion (extracellular to periplasm)                                           |
| ARGDCpp_u         | -0.00538 | 5     | Arginine decarboxylase                                                                                 |
| EX_pyr_e_l        | -0.00535 | 7     | Pyruvate exchange                                                                                      |
| CPGNabcpp_u       | -0.00525 | 5     | Coprogen transport via ABC system (periplasm)                                                          |
| CFAS180E_u        | -0.00517 | 4     | Cyclopropane fatty acid synthase (Phosphatidylethanolamine, n-C18:0)                                   |
| A5PISO_l          | -0.00505 | 6     | Arabinose-5-phosphate isomerase                                                                        |
| CU2tex_u          | -0.00504 | 5     | Copper (Cu+2) transport via diffusion (extracellular to periplasm)                                     |
| GLUNpp_u          | -0.00497 | 5     | Glutaminase                                                                                            |
| MDRPD_u           | -0.00489 | 6     | 5-Methylthio-5-deoxy-D-ribulose 1-phosphate dehydratase                                                |
| PROt2rpp_l        | -0.00487 | 4     | L-proline reversible transport via proton symport (periplasm)                                          |
| EX_3hpp_e_u       | -0.00486 | 13    | 3-Hydroxypropanoate exchange                                                                           |
| **EX_hom__L_e_u** | -0.00482 | 7     | L-Homoserine exchange                                                                                  |
| EX_damp_e_l       | -0.00482 | 9     | DAMP exchange                                                                                          |
| FACOAEE16l_u      | -0.00481 | 5     | Fatty-acid-CoA thioesterase (hexadecenoate)                                                            |
| AACPS9_u          | -0.00479 | 6     | Acyl-[acyl-carrier-protein] synthetase (n-C8:0)                                                        |
| HPPPNtex_u        | -0.00478 | 9     | 3-(3-hydroxyphenyl)propionate transport via diffusion (extracellular to periplasm)                     |
| GLTPD_l           | -0.00469 | 6     | Galactitol-1-phosphate dehydrogenase                                                                   |
| HEPTA1_u          | -0.00464 | 7     | heptosyltransferase I LPS core synthesis                                                               |
| 3hoxpactex_l      | -0.00459 | NA    | 3 hydroxyphenylacetic acid transport via diffusion extracellular to periplasm                          |
| UDPGtex_l         | -0.00458 | 7     | UDPglucose transport via diffusion (extracellular to periplasm)                                        |
| MCPST_u           | -0.00455 | 5     | 3-mercaptopyruvate sulfurtransferase                                                                   |
| GLYC2Ptex_u       | -0.00454 | 6     | Glycerol-2-phosphate transport via diffusion (extracellular to periplasm)                              |
| NTD9_u            | -0.00453 | 5     | 5'-nucleotidase (GMP)                                                                                  |
| PGI_l             | -0.00453 | 4     | Glucose-6-phosphate isomerase                                                                          |
| CBLAT_l           | -0.00452 | 4     | Cob(I)alamin adenosyltransferase                                                                       |
| UM4PCP_u          | -0.00445 | 5     | UDP-N-acetylmuramoyl-L-alanyl-D-gamma-glutamyl-meso-2,6-diaminopimelate-D-alanine L,D-carboxypeptidase |

|                | original | gdist | Name                                                                                            |
|----------------|----------|-------|-------------------------------------------------------------------------------------------------|
| HCINNMt2rpp_u  | -0.00442 | 8     | 3-hydroxycinnamic acid transport via proton symport, reversible (periplasm)                     |
| GLUABUTt7pp_u  | -0.00439 | 4     | 4-aminobutyrate/glutamate antiport (periplasm)                                                  |
| M1PD_u         | -0.00434 | 5     | Mannitol-1-phosphate 5-dehydrogenase                                                            |
| PLIPA2A120pp_u | -0.00433 | 6     | Phospholipase A2 (phosphatidate, n-C12:0) (periplasm)                                           |
| ACLS_u         | -0.00428 | 5     | Acetolactate synthase                                                                           |
| EX_cynt_e_l    | -0.00421 | 8     | Cyanate exchange                                                                                |
| 2AGPG161tipp_u | -0.0042  | 5     | 2-Acyl-sn-glycero-3-phosphoglycerol (n-C16:1) transporter via facilitated diffusion (periplasm) |
| MALDDH_u       | -0.00419 | 5     | Malate decarboxylating oxidoreductase (decarboxylating)                                         |
| GLCURt2rpp_u   | -0.00416 | 9     | D-glucuronate transport via proton symport, reversible (periplasm)                              |
| AMAOTr_l       | -0.00411 | 4     | Adenosylmethionine-8-amino-7-oxononanoate transaminase                                          |
| ASPK_l         | -0.00404 | 4     | Aspartate kinase                                                                                |
| SERtex_l       | -0.00404 | 5     | L-serine transport via diffusion (extracellular to periplasm)                                   |
| MOX_u          | -0.00402 | 5     | Malate oxidase                                                                                  |
| ASO3tex_l      | -0.004   | 9     | Arsenite transport via diffusion (extracellular to periplasm)                                   |
| FALDH2_l       | -0.00396 | 6     | Formaldehyde dehydrogenase                                                                      |
| GLCNt2rpp_u    | -0.00392 | 6     | D-gluconate transport via proton symport, reversible (periplasm)                                |
| ANS_u          | -0.00392 | 4     | Anthranilate synthase                                                                           |
| NAtex_l        | -0.00392 | NA    | NA                                                                                              |
| FCLPA_l        | -0.00388 | 5     | L-fucose 1-phosphate aldolase                                                                   |
| ME1_u          | -0.00388 | 5     | Malic enzyme (NAD)                                                                              |
| PRPPS_l        | -0.00386 | 5     | Phosphoribosylpyrophosphate synthetase                                                          |
| UREAtpp_l      | 0.00386  | 5     | Urea transport via facilitate diffusion (periplasm)                                             |
| EX_r5p_e_u     | 0.00388  | 9     | Alpha-D-Ribose 5-phosphate exchange                                                             |
| ALAALAr_u      | 0.00391  | 5     | D-alanine-D-alanine ligase (reversible)                                                         |
| FEOXAMUtex_u   | 0.00393  | 6     | Ferroxamine (minus Fe3) secretion (to extracellular)                                            |
| PUNP6_l        | 0.00402  | 6     | Purine-nucleoside phosphorylase (Deoxyinosine)                                                  |
| NDPK3_l        | 0.00404  | 4     | Nucleoside-diphosphate kinase (ATP:CDP)                                                         |
| CLPNS141pp_l   | 0.00407  | 5     | Cardiolipin synthase (periplasmic, n-C14:1)                                                     |
| EX_23ccmp_e_l  | 0.00408  | 10    | 2',3'-Cyclic CMP exchange                                                                       |
| NDPK7_l        | 0.00411  | 4     | Nucleoside-diphosphate kinase (ATP:dCDP)                                                        |
| EX_glyald_e_l  | 0.00414  | 9     | D-Glyceraldehyde exchange                                                                       |
| NO3R2bpp_u     | 0.00415  | 7     | Nitrate reductase (Menaquinol-8) (periplasm)                                                    |
| F6PA_l         | 0.00421  | 5     | Fructose 6-phosphate aldolase                                                                   |
| SPMDabcpp_u    | 0.00424  | 4     | Spermidine transport via ABC system (periplasm)                                                 |
| FRULYStex_l    | 0.00426  | 6     | Fructoselysine transporter via diffusion (extracellular)                                        |
| EX_slnt_e_l    | 0.00431  | 10    | Selenite exchange                                                                               |
| GLYC2Ptex_l    | 0.00431  | 6     | Glycerol-2-phosphate transport via diffusion (extracellular to periplasm)                       |
| EX_acgam1p_e_u | 0.00431  | 8     | N-Acetyl-D-glucosamine 1-phosphate exchange                                                     |
| DINStex_l      | 0.00432  | 8     | Deoxyinosine transport via diffusion (extracellular to periplasm)                               |
| SUCBZL_u       | 0.00435  | 6     | O-succinylbenzoate-CoA ligase                                                                   |
| EX_oedca_e_l   | 0.00443  | 8     | Octadecanoate (n-C18:0) exchange                                                                |
| EX_cl_e_l      | 0.00446  | 6     | Chloride exchange                                                                               |
| EX_hg2_e_l     | 0.00449  | NA    | Hg2+ exchange                                                                                   |
| PTAr_u         | 0.00451  | 4     | Phosphotransacetylase                                                                           |
| DALAtex_l      | 0.0046   | 5     | D-Alanine transport via diffusion (extracellular to periplasm)                                  |
| EX_g3pe_e_l    | 0.00462  | 7     | Sn-Glycero-3-phosphoethanolamine exchange                                                       |
| G3PD7_u        | 0.00463  | 4     | Glycerol-3-phosphate dehydrogenase (demethylmenaquinone-8)                                      |
| EX_g3pc_e_l    | 0.0047   | 8     | Sn-Glycero-3-phosphocholine exchange                                                            |
| APRAUR_u       | 0.00481  | 6     | 5-amino-6-(5-phosphoribosylamino)uracil reductase                                               |

|                       | original | gdist | Name                                                                                              |
|-----------------------|----------|-------|---------------------------------------------------------------------------------------------------|
| ECOAHS_1              | 0.00483  | 6     | 3-hydroxyacyl-CoA dehydratase (3-hydroxyoctadecanoyl-CoA)                                         |
| PLIPA2A180pp_u        | 0.00489  | 6     | Phospholipase A2 (phosphatidate, n-C18:0) (periplasm)                                             |
| GALAMtex_u            | 0.00491  | NA    | D Galactosamine transport transport via diffusion extracellular to periplasm                      |
| SUCBZS_u              | 0.005    | 5     | O-succinylbenzoate-CoA synthase                                                                   |
| MEOHtex_1             | 0.00512  | 7     | Methanol transport via diffusion (extracellular to periplasm)                                     |
| PRMICI_1              | 0.00513  | 5     | 1-(5-phosphoribosyl)-5-[(5-phosphoribosylamino)methylideneamino]imidazole-4-carboxamide isomerase |
| ACACtex_1             | 0.00517  | 6     | Acetoacetate transport via diffusion (extracellular to periplasm)                                 |
| MTHFC_1               | 0.00519  | 4     | Methenyltetrahydrofolate cyclohydrolase                                                           |
| ACONTa_u              | 0.0052   | 5     | Aconitase (half-reaction A, Citrate hydro-lyase)                                                  |
| HCYSMT2_u             | 0.00524  | 4     | Homocysteine Methyltransferase                                                                    |
| EX_gam6p_e_u          | 0.00531  | 7     | D-Glucosamine 6-phosphate exchange                                                                |
| EX_dad_2_e_1          | 0.00538  | 8     | Deoxyadenosine exchange                                                                           |
| EX_glcr_e_1           | 0.00551  | 9     | D-Glucarate exchange                                                                              |
| EX_rmn_e_u            | 0.0057   | 10    | L-Rhamnose exchange                                                                               |
| LPLIPAL2A161_u        | 0.00587  | 5     | Lysophospholipase L2 (2-acylglycerophosphotidate, n-C16:1)                                        |
| LEUt2rpp_1            | 0.00601  | 4     | L-leucine reversible transport via proton symport (periplasm)                                     |
| ALAGLUE_u             | 0.00624  | 5     | L-alanyl-gamma-glutamate epimerase                                                                |
| LADGMDH_u             | 0.00681  | 4     | L-alanyl-gamma-D-glutamyl-meso-diaminopimelate hydrolase                                          |
| PSCLYST2pp_u          | 0.00692  | 6     | Psicoselysine transport via proton symport (periplasm)                                            |
| EX_psclys_e_1         | 0.00718  | 8     | Psicoselysine exchange                                                                            |
| MDH2_u                | 0.0072   | 5     | Malate dehydrogenase (ubiquinone 8 as acceptor)                                                   |
| PSCLYSTex_u           | 0.00745  | 7     | Psicoselysine transporter via diffusion (extracellular)                                           |
| LALGP_u               | 0.00761  | 4     | L-alanyl-gamma-L-glutamate peptidase                                                              |
| EX_akg_e_1            | 0.00809  | 7     | 2-Oxoglutarate exchange                                                                           |
| GRTT_u                | 0.0084   | 5     | Geranyltranstransferase                                                                           |
| EX_3ump_e_u           | 0.00874  | 9     | 3'-UMP exchange                                                                                   |
| ADNCYC_u              | 0.00915  | NA    | Adenylate cyclase                                                                                 |
| FRULYSTex_u           | 0.00917  | 6     | Fructoselysine transporter via diffusion (extracellular)                                          |
| DAPabcpp_u            | 0.00945  | 4     | M-diaminopimelic acid ABC transport (periplasm)                                                   |
| AGM3PH_u              | 0.00958  | 6     | N-Acetyl-D-glucosamine(anhydrous)N-Acetylmuramyl-tripeptide beta -1,4-N-acetylglucosaminidase     |
| FEOXAMabcpp_u         | 0.00985  | 5     | Ferroxamine transport via ABC system (periplasm)                                                  |
| SELNPS_u              | 0.0101   | 6     | Selenophosphate synthase                                                                          |
| 26DAHtex_u            | 0.0102   | 5     | Meso-2,6-Diaminoheptanedioate transport via diffusion (extracellular to periplasm)                |
| FRULYST2pp_u          | 0.0104   | 5     | Fructoselysine transport via proton symport (periplasm)                                           |
| **EX_26dap__M_0.0112  | 0.0112   | 6     | Meso-2,6-Diaminoheptanedioate exchange                                                            |
| EX_frulys_e_1         | 0.0112   | 7     | Fructoselysine exchange                                                                           |
| MOHMT_u               | 0.0129   | 4     | 3-methyl-2-oxobutanoate hydroxymethyltransferase                                                  |
| CBMD_u                | 0.0172   | 8     | Carbamate deaminase                                                                               |
| FRULYSDG_u            | 0.0498   | 3     | Fructoselysine phosphate deglycase                                                                |
| FRULYSK_u             | 0.052    | 4     | Fructoselysine Kinase                                                                             |
| DAPDC_u               | 0.12     | 3     | Diaminopimelate decarboxylase                                                                     |
| **EX_lys__L_e_u*0.487 | 0.487    | 0     | L-Lysine exchange                                                                                 |
| LYStex_1              | 0.487    | 1     | L-lysine transport via diffusion (extracellular to periplasm)                                     |
| LYSt3pp_u             | 0.487    | 2     | L-lysine transport out via proton antiport (cytoplasm to periplasm)                               |

```
pander(df005[order(df005$original),c("original","gdist","Equation")],
      justify = c('left', 'center', 'center', 'left'))
```

|                   | original | gdist | Equation                                                 |
|-------------------|----------|-------|----------------------------------------------------------|
| HACD2i_u          | -0.0184  | 5     | 3hhcoa_c + nad_c -> 3ohcoa_c + h_c + nadh_c              |
| EX_lcts_e_u       | -0.00661 | 7     | lcts_e ->                                                |
| NOVBCNtpu_u       | -0.00624 | NA    | h_p + novbcn_p -> h_c + novbcn_e                         |
| EX_fe3hox_e_l     | -0.00595 | 7     | fe3hox_e ->                                              |
| HACD1_l           | -0.00591 | 5     | aacoa_c + h_c + nadh_c <=> 3hbcoa_c + nad_c              |
| 4PCPpp_u          | -0.00582 | 5     | LalaDgluMdapDala_p + h2o_p -> LalaDgluMdap_p + ala__D_p  |
| NO2t2rpp_l        | -0.00559 | 7     | h_p + no2_p <=> h_c + no2_c                              |
| FUSAtex_l         | -0.00547 | NA    | fusa_e <=> fusa_p                                        |
| ACALDtex_l        | -0.00545 | 6     | acald_e <=> acald_p                                      |
| CTBTt2rpp_l       | -0.00541 | NA    | ctbt_p + h_p <=> ctbt_c + h_c                            |
| NO3tex_u          | -0.00539 | 7     | no3_e <=> no3_p                                          |
| ARGDCpp_u         | -0.00538 | 5     | arg__L_p + h_p -> agm_p + co2_p                          |
| EX_pyr_e_l        | -0.00535 | 7     | pyr_e ->                                                 |
| CPGNabcpp_u       | -0.00525 | 5     | atp_c + cpn_p + h2o_c -> adp_c + cpn_c + h_c + pi_c      |
| CFAS180E_u        | -0.00517 | 4     | 2.0 amet_c + pe181_c -> 2.0 ahcys_c + cpe180_c + 2.0 h_c |
| A5PISO_l          | -0.00505 | 6     | ru5p__D_c <=> ara5p_c                                    |
| CU2tex_u          | -0.00504 | 5     | cu2_e <=> cu2_p                                          |
| GLUNpp_u          | -0.00497 | 5     | gln__L_p + h2o_p -> glu__L_p + nh4_p                     |
| MDRPD_u           | -0.00489 | 6     | 5mdrulp_c -> dkmp_c + h2o_c                              |
| PROt2rpp_l        | -0.00487 | 4     | h_p + pro__L_p <=> h_c + pro__L_c                        |
| EX_3hpp_e_u       | -0.00486 | 13    | 3hpp_e ->                                                |
| **EX_hom__L_e_l** | -0.00482 | 7     | hom__L_e ->                                              |
| EX_damp_e_l       | -0.00482 | 9     | damp_e ->                                                |
| FACOA161_u        | -0.00481 | 5     | h2o_c + hcoa_c -> coa_c + h_c + hcoa_c                   |
| AACPS9_u          | -0.00479 | 6     | ACP_c + atp_c + octa_c -> amp_c + ocACP_c + ppi_c        |
| HPPPNtex_u        | -0.00478 | 9     | 3hppn_e <=> 3hppn_p                                      |
| GLTPD_l           | -0.00469 | 6     | galt1p_c + nad_c <=> h_c + nadh_c + tag6p__D_c           |
| HEPTA1_u          | -0.00464 | 7     | adphec_LD_c + lipaA_c -> adp_c + h_c + hlipaA_c          |
| 3hoxpactex_l      | -0.00459 | NA    | 3hoxpac_e <=> 3hoxpac_p                                  |
| UDPGtex_l         | -0.00458 | 7     | udpg_e <=> udpg_p                                        |
| MCPST_u           | -0.00455 | 5     | cyan_c + mercppyr_c -> h_c + pyr_c + tcynt_c             |
| GLYC2Ptex_u       | -0.00454 | 6     | glyc2p_e <=> glyc2p_p                                    |
| NTD9_u            | -0.00453 | 5     | gmp_c + h2o_c -> gsn_c + pi_c                            |
| PGI_l             | -0.00453 | 4     | g6p_c <=> f6p_c                                          |
| CBLAT_l           | -0.00452 | 4     | atp_c + cbl1_c + h_c <=> adocbl_c + ppi_c                |
| UM4PCP_u          | -0.00445 | 5     | h2o_c + um4p_c -> ala__D_c + ugmd_c                      |
| HCINNMt2rpp_u     | -0.00442 | 8     | 3hcinnm_p + h_p <=> 3hcinnm_c + h_c                      |

|                | original | gdist | Equation                                               |
|----------------|----------|-------|--------------------------------------------------------|
| GLUABUTt7pp_u  | -0.00439 | 4     | 4abut_c + glu__L_p <=> 4abut_p + glu__L_c              |
| M1PD_u         | -0.00434 | 5     | mn11p_c + nad_c <=> f6p_c + h_c + nadh_c               |
| PLIPA2A120pp_u | -0.00433 | 6     | h2o_p + pa120_p -> 1ddecg3p_p + ddca_p + h_p           |
| ACLS_u         | -0.00428 | 5     | h_c + 2.0 pyr_c -> alac__S_c + co2_c                   |
| EX_cynt_e_l    | -0.00421 | 8     | cynt_e ->                                              |
| 2AGPG161tipp_u | -0.0042  | 5     | 2agpg161_p -> 2agpg161_c                               |
| MALDDH_u       | -0.00419 | 5     | mal__D_c + nad_c -> co2_c + nadh_c + pyr_c             |
| GLCURt2rpp_u   | -0.00416 | 9     | glcur_p + h_p <=> glcur_c + h_c                        |
| AMAOTr_l       | -0.00411 | 4     | 8aonn_c + amet_c <=> amob_c + dann_c                   |
| ASPK_l         | -0.00404 | 4     | asp__L_c + atp_c <=> 4pasp_c + adp_c                   |
| SERtex_l       | -0.00404 | 5     | ser__L_e <=> ser__L_p                                  |
| MOX_u          | -0.00402 | 5     | mal__L_c + o2_c <=> h2o2_c + oaa_c                     |
| ASO3tex_l      | -0.004   | 9     | aso3_e <=> aso3_p                                      |
| FALDH2_l       | -0.00396 | 6     | hmgth_c + nad_c <=> Sfglutth_c + h_c + nadh_c          |
| GLCNt2rpp_u    | -0.00392 | 6     | glcn_p + h_p <=> glcn_c + h_c                          |
| ANS_u          | -0.00392 | 4     | chor_c + gln__L_c -> anth_c + glu__L_c + h_c + pyr_c   |
| NAtex_l        | -0.00392 | NA    | NA                                                     |
| FCLPA_l        | -0.00388 | 5     | fc1p_c <=> dhap_c + lald__L_c                          |
| ME1_u          | -0.00388 | 5     | mal__L_c + nad_c -> co2_c + nadh_c + pyr_c             |
| PRPPS_l        | -0.00386 | 5     | atp_c + r5p_c <=> amp_c + h_c + prpp_c                 |
| UREAtpp_l      | 0.00386  | 5     | urea_p <=> urea_c                                      |
| EX_r5p_e_u     | 0.00388  | 9     | r5p_e ->                                               |
| ALAALAr_u      | 0.00391  | 5     | 2.0 ala__D_c + atp_c <=> adp_c + alaala_c + h_c + pi_c |
| FEOXAMUtex_u   | 0.00393  | 6     | feoxam_un_p + h_p -> feoxam_un_e + h_c                 |
| PUNP6_l        | 0.00402  | 6     | din_c + pi_c <=> 2dr1p_c + hxan_c                      |
| NDPK3_l        | 0.00404  | 4     | atp_c + cdp_c <=> adp_c + ctp_c                        |
| CLPNS141pp_l   | 0.00407  | 5     | 2.0 pg141_p <=> clpn141_p + glyc_p                     |
| EX_23ccmp_e_l  | 0.00408  | 10    | 23ccmp_e ->                                            |
| NDPK7_l        | 0.00411  | 4     | atp_c + dcdp_c <=> adp_c + dctp_c                      |
| EX_glyald_e_l  | 0.00414  | 9     | glyald_e ->                                            |
| NO3R2bpp_u     | 0.00415  | 7     | mql8_c + no3_p -> h2o_p + mqn8_c + no2_p               |
| F6PA_l         | 0.00421  | 5     | f6p_c <=> dha_c + g3p_c                                |
| SPMDabcpp_u    | 0.00424  | 4     | atp_c + h2o_c + spmd_p -> adp_c + h_c + pi_c + spmd_c  |
| FRULYStex_l    | 0.00426  | 6     | frulys_e <=> frulys_p                                  |
| EX_slnt_e_l    | 0.00431  | 10    | slnt_e <=>                                             |
| GLYC2Ptex_l    | 0.00431  | 6     | glyc2p_e <=> glyc2p_p                                  |
| EX_acgam1p_e_u | 0.00431  | 8     | acgam1p_e ->                                           |
| DINStex_l      | 0.00432  | 8     | din_e <=> din_p                                        |

|                | original | gdist | Equation                                                         |
|----------------|----------|-------|------------------------------------------------------------------|
| SUCBZL_u       | 0.00435  | 6     | atp_c + coa_c + sucbz_c -> amp_c +<br>ppi_c + sbzcoa_c           |
| EX_ocdca_e_l   | 0.00443  | 8     | ocdca_e ->                                                       |
| EX_cl_e_l      | 0.00446  | 6     | cl_e <=>                                                         |
| EX_hg2_e_l     | 0.00449  | NA    | hg2_e ->                                                         |
| PTAr_u         | 0.00451  | 4     | accoa_c + pi_c <=> actp_c + coa_c                                |
| DALAtex_l      | 0.0046   | 5     | ala__D_e <=> ala__D_p                                            |
| EX_g3pe_e_l    | 0.00462  | 7     | g3pe_e ->                                                        |
| G3PD7_u        | 0.00463  | 4     | 2dmmq8_c + glyc3p_c -> 2dmmql8_c +<br>dhap_c                     |
| EX_g3pc_e_l    | 0.0047   | 8     | g3pc_e ->                                                        |
| APRAUR_u       | 0.00481  | 6     | 5apru_c + h_c + nadph_c -> 5aprbu_c +<br>nadp_c                  |
| ECOA8_l        | 0.00483  | 6     | 3hodcoa_c <=> h2o_c + od2coa_c                                   |
| PLIPA2A180pp_u | 0.00489  | 6     | h2o_p + pa180_p -> lodecg3p_p + h_p<br>+ ocdca_p                 |
| GALAMtex_u     | 0.00491  | NA    | galam_e <=> galam_p                                              |
| SUCBZS_u       | 0.005    | 5     | 2shhc_c -> h2o_c + sucbz_c                                       |
| MEOHtex_l      | 0.00512  | 7     | meoh_e <=> meoh_p                                                |
| PRMCI_l        | 0.00513  | 5     | prfp_c <=> prlp_c                                                |
| ACACtex_l      | 0.00517  | 6     | acac_e <=> acac_p                                                |
| MTHFC_l        | 0.00519  | 4     | h2o_c + methf_c <=> 10fthf_c + h_c                               |
| ACONTa_u       | 0.0052   | 5     | cit_c <=> acon_C_c + h2o_c                                       |
| HCYSMT2_u      | 0.00524  | 4     | hcys__L_c + mmet_c -> h_c + 2.0<br>met__L_c                      |
| EX_gam6p_e_u   | 0.00531  | 7     | gam6p_e ->                                                       |
| EX_dad_2_e_l   | 0.00538  | 8     | dad_2_e ->                                                       |
| EX_glcr_e_l    | 0.00551  | 9     | glcr_e ->                                                        |
| EX_rmn_e_u     | 0.0057   | 10    | rmn_e ->                                                         |
| LPLIPAL2A161_u | 0.00587  | 5     | 2hdec9eg3p_c + h2o_c -> glyc3p_c + 2.0<br>h_c + hdcea_c          |
| LEUt2rpp_l     | 0.00601  | 4     | h_p + leu__L_p <=> h_c + leu__L_c                                |
| ALAGLUE_u      | 0.00624  | 5     | LalaDglu_c <=> LalaLglu_c                                        |
| LADGMDH_u      | 0.00681  | 4     | LalaDgluMdap_c + h2o_c -><br>26dap__M_c + LalaDglu_c             |
| PSCLYSt2pp_u   | 0.00692  | 6     | h_p + psclys_p -> h_c + psclys_c                                 |
| EX_psclys_e_l  | 0.00718  | 8     | psclys_e ->                                                      |
| MDH2_u         | 0.0072   | 5     | mal__L_c + q8_c -> oaa_c + q8h2_c                                |
| PSCLYStex_u    | 0.00745  | 7     | psclys_e <=> psclys_p                                            |
| LALGP_u        | 0.00761  | 4     | LalaLglu_c + h2o_c -> ala__L_c +<br>glu__L_c                     |
| EX_akg_e_l     | 0.00809  | 7     | akg_e ->                                                         |
| GRTT_u         | 0.0084   | 5     | grdp_c + ipdp_c -> frdp_c + ppi_c                                |
| EX_3ump_e_u    | 0.00874  | 9     | 3ump_e ->                                                        |
| ADNCYC_u       | 0.00915  | NA    | atp_c -> camp_c + ppi_c                                          |
| FRULYStex_u    | 0.00917  | 6     | frulys_e <=> frulys_p                                            |
| DAPabcpp_u     | 0.00945  | 4     | 26dap__M_p + atp_c + h2o_c -><br>26dap__M_c + adp_c + h_c + pi_c |
| AGM3PH_u       | 0.00958  | 6     | anhgm3p_c + h2o_c -> acgam_c +<br>anhm3p_c                       |
| FEOXAMabcpp_u  | 0.00985  | 5     | atp_c + feoxam_p + h2o_c -> adp_c +<br>feoxam_c + h_c + pi_c     |

|                     | original | gdist | Equation                                            |
|---------------------|----------|-------|-----------------------------------------------------|
| SELNPS_u            | 0.0101   | 6     | atp_c + h2o_c + seln_c -> amp_c + pi_c<br>+ selnp_c |
| 26DAHtex_u          | 0.0102   | 5     | 26dap__M_e <=> 26dap__M_p                           |
| FRULYSt2pp_u        | 0.0104   | 5     | frulys_p + h_p -> frulys_c + h_c                    |
| **EX_26dap__M_e_l** | 0.0112   | 6     | 26dap__M_e ->                                       |
| EX_frulys_e_l       | 0.0112   | 7     | frulys_e ->                                         |
| MOHMT_u             | 0.0129   | 4     | 3mob_c + h2o_c + mlthf_c -> 2dhp_c +<br>thf_c       |
| CBMD_u              | 0.0172   | 8     | cbm_c + 2.0 h_c -> co2_c + nh4_c                    |
| FRULYSDG_u          | 0.0498   | 3     | frulysp_c + h2o_c <=> g6p_c +<br>lys__L_c           |
| FRULYSK_u           | 0.052    | 4     | atp_c + frulys_c -> adp_c + frulysp_c +<br>h_c      |
| DAPDC_u             | 0.12     | 3     | 26dap__M_c + h_c -> co2_c +<br>lys__L_c             |
| **EX_lys__L_e_u**   | 0.487    | 0     | lys__L_e ->                                         |
| LYStex_l            | 0.487    | 1     | lys__L_e <=> lys__L_p                               |
| LYSt3pp_u           | 0.487    | 2     | h_p + lys__L_c -> h_c + lys__L_p                    |

## 2 Appendix

### 2.1 Functions

```
## Custom functions used in the analysis should go into this chunk.
## They will be listed in their own section of the appendix.

##===== Functions =====##
```

### 2.2 Setup R

```
## This chunk should contain global configuration commands.
## Use this to set knitr options and related things. Everything
## in this chunk will be included in an appendix to document the
## configuration used.
#output <- opts_knit$get("rmarkdown.pandoc.to")
knitr::opts_knit$set(stop_on_error = 2L)

## By default R code is only included in HTML versions of the report
## (where it can be collapsed). You can generate a PDF version
## using rmarkdown::pdf_document to get a copy for print. Extensive
## chunks of R code may or may not be desired in /hat setting. If you
## want them simply change the following arguments to `echo = TRUE`.
## In either case the default can be overwritten for individual chunks.
#opts_chunk$set(echo = output=="html")
#opts_chunk$set(warning = output=="html")
#opts_chunk$set(message = output=="html")

## Cache options
knitr::opts_chunk$set(cache=TRUE,warning=FALSE)
```



```

## Figure options
## Set default figure format
#options(reportmd.figure.format=params$format)

## Set 'hide.fig.code' to FALSE to include code chunks that
## produce Figures in the output. Note that this affects all chunks
## that provide a figure caption.
knitr::opts_chunk$set(hold=TRUE, hide.fig.code=FALSE)

## Set up default plotting options for different formats.
## These can be overwritten for individual chunks
#interactiveFig()
#screenFig()
#printFig()

## Pandr options
pander::panderOptions("digits", 3)
pander::panderOptions("table.split.table", 160)
#panderOptions("table.style", "grid")

## Configure Figure and Table labels
#options(figcap.prefix = "Figure", figcap.sep = ":", figcap.prefix.highlight = "***")
#options(tabcap.prefix = "Table", tabcap.sep = ":", tabcap.prefix.highlight = "***")

## Install required knitr hooks
#installHooks()

```

## 2.3 Versions

### 2.3.1 Document version

### 2.3.2 Session Info

#### Platform

- version: R version 4.2.1 (2022-06-23)
- os: macOS Big Sur ... 10.16
- system: x86\_64, darwin17.0
- ui: X11
- language: (EN)
- collate: en\_US.UTF-8
- ctype: en\_US.UTF-8
- tz: Asia/Tokyo
- date: 2022-12-04
- pandoc: 2.19.2 @ /Applications/RStudio.app/Contents/MacOS/quarto/bin/tools/ (via rmarkdown)

#### Packages

|            | ondiskversion | loadedversion | date       | source         |
|------------|---------------|---------------|------------|----------------|
| assertthat | 0.2.1         | 0.2.1         | 2019-03-21 | CRAN (R 4.2.0) |
| backports  | 1.4.1         | 1.4.1         | 2021-12-13 | CRAN (R 4.2.0) |
| boot       | 1.3.28        | 1.3-28        | 2021-05-03 | CRAN (R 4.2.1) |
| cachem     | 1.0.6         | 1.0.6         | 2021-08-19 | CRAN (R 4.2.0) |
| callr      | 3.7.3         | 3.7.3         | 2022-11-02 | CRAN (R 4.2.0) |
| checkmate  | 2.1.0         | 2.1.0         | 2022-04-21 | CRAN (R 4.2.0) |

|                | ondiskversion | loadedversion | date       | source         |
|----------------|---------------|---------------|------------|----------------|
| class          | 7.3.20        | 7.3-20        | 2022-01-16 | CRAN (R 4.2.1) |
| cli            | 3.4.1         | 3.4.1         | 2022-09-23 | CRAN (R 4.2.0) |
| clue           | 0.3.62        | 0.3-62        | 2022-10-18 | CRAN (R 4.2.0) |
| cluster        | 2.1.4         | 2.1.4         | 2022-08-22 | CRAN (R 4.2.0) |
| codetools      | 0.2.18        | 0.2-18        | 2020-11-04 | CRAN (R 4.2.1) |
| colorspace     | 2.0.3         | 2.0-3         | 2022-02-21 | CRAN (R 4.2.0) |
| crayon         | 1.5.2         | 1.5.2         | 2022-09-29 | CRAN (R 4.2.0) |
| data.table     | 1.14.4        | 1.14.4        | 2022-10-17 | CRAN (R 4.2.1) |
| DBI            | 1.1.3         | 1.1.3         | 2022-06-18 | CRAN (R 4.2.0) |
| deSolve        | 1.34          | 1.34          | 2022-10-22 | CRAN (R 4.2.0) |
| devtools       | 2.4.5         | 2.4.5         | 2022-10-11 | CRAN (R 4.2.1) |
| digest         | 0.6.30        | 0.6-30        | 2022-10-18 | CRAN (R 4.2.0) |
| dplyr          | 1.0.10        | 1.0.10        | 2022-09-01 | CRAN (R 4.2.1) |
| dtw            | 1.23.1        | 1.23-1        | 2022-09-19 | CRAN (R 4.2.0) |
| dtwclust       | 5.5.11        | 5.5.11        | 2022-09-24 | CRAN (R 4.2.0) |
| ellipsis       | 0.3.2         | 0.3.2         | 2021-04-29 | CRAN (R 4.2.0) |
| evaluate       | 0.18          | 0.18          | 2022-11-07 | CRAN (R 4.2.0) |
| fansi          | 1.0.3         | 1.0.3         | 2022-03-24 | CRAN (R 4.2.0) |
| farver         | 2.1.1         | 2.1.1         | 2022-07-06 | CRAN (R 4.2.0) |
| fastmap        | 1.1.0         | 1.1.0         | 2021-01-25 | CRAN (R 4.2.0) |
| flexclust      | 1.4.1         | 1.4-1         | 2022-04-08 | CRAN (R 4.2.0) |
| foreach        | 1.5.2         | 1.5.2         | 2022-02-02 | CRAN (R 4.2.0) |
| fs             | 1.5.2         | 1.5.2         | 2021-12-08 | CRAN (R 4.2.0) |
| generics       | 0.1.3         | 0.1.3         | 2022-07-05 | CRAN (R 4.2.0) |
| ggplot2        | 3.4.0         | 3.4.0         | 2022-11-04 | CRAN (R 4.2.0) |
| ggrepel        | 0.9.2         | 0.9.2         | 2022-11-06 | CRAN (R 4.2.0) |
| glue           | 1.6.2         | 1.6.2         | 2022-02-24 | CRAN (R 4.2.0) |
| gtable         | 0.3.1         | 0.3.1         | 2022-09-01 | CRAN (R 4.2.1) |
| highr          | 0.9           | 0.9           | 2021-04-16 | CRAN (R 4.2.0) |
| htmltools      | 0.5.3         | 0.5.3         | 2022-07-18 | CRAN (R 4.2.0) |
| htmlwidgets    | 1.5.4         | 1.5.4         | 2021-09-08 | CRAN (R 4.2.0) |
| httpuv         | 1.6.6         | 1.6.6         | 2022-09-08 | CRAN (R 4.2.0) |
| iterators      | 1.0.14        | 1.0.14        | 2022-02-05 | CRAN (R 4.2.0) |
| knitr          | 1.41          | 1.41          | 2022-11-18 | CRAN (R 4.2.0) |
| labeling       | 0.4.2         | 0.4.2         | 2020-10-20 | CRAN (R 4.2.0) |
| later          | 1.3.0         | 1.3.0         | 2021-08-18 | CRAN (R 4.2.0) |
| lattice        | 0.20.45       | 0.20-45       | 2021-09-22 | CRAN (R 4.2.1) |
| lifecycle      | 1.0.3         | 1.0.3         | 2022-10-07 | CRAN (R 4.2.1) |
| magrittr       | 2.0.3         | 2.0.3         | 2022-03-30 | CRAN (R 4.2.0) |
| Matrix         | 1.5.1         | 1.5-1         | 2022-09-13 | CRAN (R 4.2.0) |
| memoise        | 2.0.1         | 2.0.1         | 2021-11-26 | CRAN (R 4.2.0) |
| mime           | 0.12          | 0.12          | 2021-09-28 | CRAN (R 4.2.0) |
| miniUI         | 0.1.1.1       | 0.1.1.1       | 2018-05-18 | CRAN (R 4.2.0) |
| modeltools     | 0.2.23        | 0.2-23        | 2020-03-05 | CRAN (R 4.2.0) |
| munsell        | 0.5.0         | 0.5.0         | 2018-06-12 | CRAN (R 4.2.0) |
| numbers        | 0.8.2         | 0.8-2         | 2021-05-14 | CRAN (R 4.2.0) |
| ODEnetwork     | 1.3.2         | 1.3.2         | 2020-04-03 | CRAN (R 4.2.0) |
| ODEsensitivity | 1.1.2         | 1.1.2         | 2019-01-09 | CRAN (R 4.2.0) |
| openxlsx       | 4.2.5.1       | 4.2.5.1       | 2022-10-24 | CRAN (R 4.2.0) |
| pander         | 0.6.5         | 0.6.5         | 2022-03-18 | CRAN (R 4.2.0) |
| pillar         | 1.8.1         | 1.8.1         | 2022-08-19 | CRAN (R 4.2.0) |
| pkgbuild       | 1.3.1         | 1.3.1         | 2021-12-20 | CRAN (R 4.2.0) |

|              | ondiskversion | loadedversion | date       | source         |
|--------------|---------------|---------------|------------|----------------|
| pkgconfig    | 2.0.3         | 2.0.3         | 2019-09-22 | CRAN (R 4.2.0) |
| pkgload      | 1.3.1         | 1.3.1         | 2022-10-28 | CRAN (R 4.2.0) |
| plyr         | 1.8.8         | 1.8.8         | 2022-11-11 | CRAN (R 4.2.0) |
| prettyunits  | 1.1.1         | 1.1.1         | 2020-01-24 | CRAN (R 4.2.0) |
| processx     | 3.8.0         | 3.8.0         | 2022-10-26 | CRAN (R 4.2.0) |
| profvis      | 0.3.7         | 0.3.7         | 2020-11-02 | CRAN (R 4.2.0) |
| promises     | 1.2.0.1       | 1.2.0.1       | 2021-02-11 | CRAN (R 4.2.0) |
| proxy        | 0.4.27        | 0.4-27        | 2022-06-09 | CRAN (R 4.2.0) |
| ps           | 1.7.2         | 1.7.2         | 2022-10-26 | CRAN (R 4.2.0) |
| purrr        | 0.3.5         | 0.3.5         | 2022-10-06 | CRAN (R 4.2.1) |
| R6           | 2.5.1         | 2.5.1         | 2021-08-19 | CRAN (R 4.2.0) |
| Rcpp         | 1.0.9         | 1.0.9         | 2022-07-08 | CRAN (R 4.2.0) |
| RcppParallel | 5.1.5         | 5.1.5         | 2022-01-05 | CRAN (R 4.2.0) |
| remotes      | 2.4.2         | 2.4.2         | 2021-11-30 | CRAN (R 4.2.0) |
| reshape2     | 1.4.4         | 1.4.4         | 2020-04-09 | CRAN (R 4.2.0) |
| rlang        | 1.0.6         | 1.0.6         | 2022-09-24 | CRAN (R 4.2.0) |
| rmarkdown    | 2.18          | 2.18          | 2022-11-09 | CRAN (R 4.2.1) |
| RSpectra     | 0.16.1        | 0.16-1        | 2022-04-24 | CRAN (R 4.2.0) |
| rstudioapi   | 0.14          | 0.14          | 2022-08-22 | CRAN (R 4.2.0) |
| scales       | 1.2.1         | 1.2.1         | 2022-08-20 | CRAN (R 4.2.0) |
| sensitivity  | 1.28.0        | 1.28.0        | 2022-09-29 | CRAN (R 4.2.0) |
| sessioninfo  | 1.2.2         | 1.2.2         | 2021-12-06 | CRAN (R 4.2.0) |
| shiny        | 1.7.3         | 1.7.3         | 2022-10-25 | CRAN (R 4.2.0) |
| shinyjs      | 2.1.0         | 2.1.0         | 2021-12-23 | CRAN (R 4.2.0) |
| stringi      | 1.7.8         | 1.7.8         | 2022-07-11 | CRAN (R 4.2.0) |
| stringr      | 1.4.1         | 1.4.1         | 2022-08-20 | CRAN (R 4.2.1) |
| tibble       | 3.1.8         | 3.1.8         | 2022-07-22 | CRAN (R 4.2.0) |
| tidyr        | 1.2.1         | 1.2.1         | 2022-09-08 | CRAN (R 4.2.1) |
| tidyselect   | 1.2.0         | 1.2.0         | 2022-10-10 | CRAN (R 4.2.1) |
| urlchecker   | 1.0.1         | 1.0.1         | 2021-11-30 | CRAN (R 4.2.0) |
| usethis      | 2.1.6         | 2.1.6         | 2022-05-25 | CRAN (R 4.2.0) |
| utf8         | 1.2.2         | 1.2.2         | 2021-07-24 | CRAN (R 4.2.0) |
| vctrs        | 0.5.1         | 0.5.1         | 2022-11-16 | CRAN (R 4.2.0) |
| withr        | 2.5.0         | 2.5.0         | 2022-03-03 | CRAN (R 4.2.0) |
| xfun         | 0.35          | 0.35          | 2022-11-16 | CRAN (R 4.2.0) |
| xtable       | 1.8.4         | 1.8-4         | 2019-04-21 | CRAN (R 4.2.0) |
| yaml         | 2.3.6         | 2.3.6         | 2022-10-18 | CRAN (R 4.2.0) |
| zip          | 2.2.2         | 2.2.2         | 2022-10-26 | CRAN (R 4.2.0) |
